# Supplementary material for: Synthesis of novel pyridyl containing phospholanes and their polynuclear luminescent copper(i) complexes
Source: Royal Society of Chemistry journal article supplement (doi:10.1039/c5dt03346b), 2015-11-16
Supplement: c5dt03346b1.pdf [file c5dt03346b1.pdf]

## Supporting Information for

### Synthesis of novel pyridyl containing phospholanes and their luminescent polynuclear copper(I) complexes

E.I. Musina,<sup>a,\*</sup> A.V. Shamsieva,<sup>a</sup> I.D. Strel'nik,<sup>a,b</sup> T.P. Gerasimova,<sup>a</sup> D.B. Krivolapov,<sup>a</sup>  
I.E. Kolesnikov,<sup>c</sup> E.V. Grachova,<sup>b</sup> S.P. Tunik,<sup>b</sup> C. Bannwarth,<sup>d</sup> S. Grimme,<sup>d</sup> S.A. Katsyuba,<sup>a</sup>  
A.A. Karasik<sup>a</sup> and O.G.Sinyashin<sup>a</sup>

- 
- <sup>a.</sup> *A.E. Arbuzov Institute of Organic and Physical Chemistry, Kazan Scientific Centre of the Russian Academy of Sciences, Arbuzov str. 8, 420088 Kazan, Russia*
- <sup>b.</sup> *St. Petersburg State University, Institute of Chemistry, Universitetskii pr. 26, 198504 St Petersburg, Russia*
- <sup>c.</sup> *Center for optical and laser materials research, Research park of St. Petersburg State University, Ulianovskaya St. 5, 198504 St. Petersburg, Russia*
- <sup>d.</sup> *Mulliken Center for Theoretical Chemistry, Institut für Physikalische und Theoretische Chemie der Universität Bonn, Beringstr. 4, 53115 Bonn, Germany.*

### Contents

|                                                                                                                                  |    |
|----------------------------------------------------------------------------------------------------------------------------------|----|
| <b>Figure S1</b> X-Ray molecular structure of complex <b>13</b> .                                                                | S2 |
| <b>Figure S2</b> Optimized structure of complex <b>14</b> .                                                                      | S2 |
| <b>Table S1.</b> Cartesian coordinates of the ground-state structure of complex <b>14</b> , optimized at PBE0-D3/def-TZVP level. | S3 |
| <b>Figure S3</b> Calculated (dashed lines) and experimental (solid line) absorption spectra of compound <b>4</b>                 | S4 |
| <b>Figure S4</b> Frontier molecular orbitals of compound <b>4</b> .                                                              | S4 |
| <b>Figure S5</b> Calculated absorption spectra of compounds <b>4</b> and <b>10-14</b> .                                          | S5 |
| <b>Figure S6</b> Schematic representation of the molecular orbitals for the singlet ground state of <b>12</b> .                  | S5 |
| <b>Figure S7</b> ORTEP drawing of the molecular structure of complex <b>10</b> .                                                 | S6 |
| <b>Figure S8</b> ORTEP drawing of the molecular structure of complex <b>12</b> .                                                 | S6 |

**Figure S1** Molecular structure of complex **13**\*.

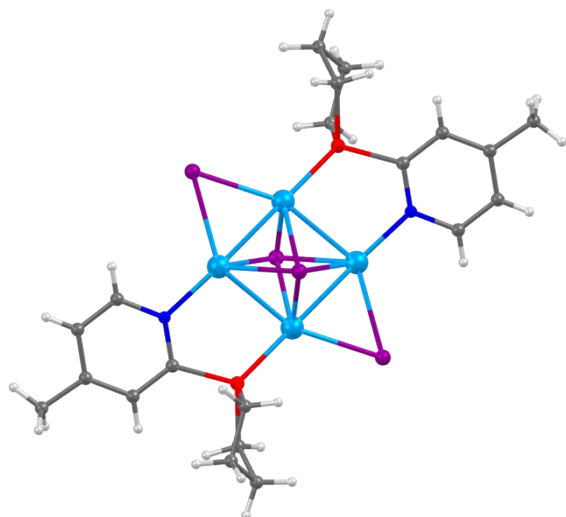

Colour legend: copper, light blue; nitrogen, blue; phosphorous, red; iodine, plum; carbon, grey; hydrogen, light grey.

**Figure S2** Ground-state structure of complex **14**, optimized at PBE0-D3/def-TZVP level.

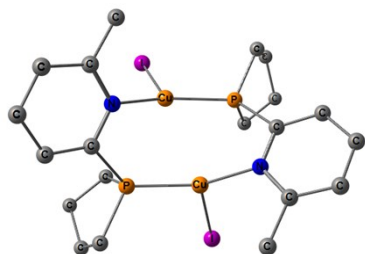

\* Picture was generated with DIAMOND Version 3.2k (Copyright Crystal Impact GbR)

**Table S1.** Cartesian coordinates of the ground-state structure of complex **14**, optimized at PBE0-D3/def-TZVP level.

|    | X            | Y            | Z            |
|----|--------------|--------------|--------------|
| I  | -2.912116794 | 1.372694119  | -2.095563944 |
| I  | 2.913161340  | -1.373166896 | -2.093801756 |
| Cu | -1.302598769 | 0.611329494  | -0.213858725 |
| Cu | 1.302652081  | -0.611392869 | -0.213105405 |
| P  | 0.296773398  | 2.155383533  | -0.394070732 |
| P  | -0.296641847 | -2.155473571 | -0.393814239 |
| N  | -2.165013312 | -0.815971299 | 0.912633756  |
| N  | 2.164493671  | 0.816140215  | 0.913535262  |
| C  | -1.763374840 | -2.084207490 | 0.718543911  |
| C  | -2.421280810 | -3.152248255 | 1.305936035  |
| C  | -3.519809673 | -2.894777980 | 2.111598716  |
| C  | -3.928150740 | -1.586699955 | 2.300224596  |
| C  | -3.234996610 | -0.555019457 | 1.678065740  |
| C  | -3.628411212 | 0.873406641  | 1.818821570  |
| C  | 1.762934308  | 2.084340070  | 0.719041387  |
| C  | 2.420460849  | 3.152472648  | 1.306689718  |
| C  | 3.518846287  | 2.895177281  | 2.112605738  |
| C  | 3.926822714  | 1.587100676  | 2.302020705  |
| C  | 3.234202592  | 0.555338890  | 1.679403845  |
| C  | 3.628394747  | -0.872943249 | 1.819451622  |
| H  | -2.092303257 | -4.167646398 | 1.130751070  |
| H  | -4.055597966 | -3.710146568 | 2.584420049  |
| H  | -4.781226058 | -1.353673116 | 2.925103811  |
| H  | -2.780232842 | 1.463633717  | 2.177422582  |
| H  | -4.462523355 | 0.994208833  | 2.509355685  |
| H  | -3.906910276 | 1.273296356  | 0.837688960  |
| H  | 2.091033876  | 4.167786792  | 1.131867184  |
| H  | 4.055130224  | 3.710711433  | 2.584575756  |
| H  | 4.778892046  | 1.354099159  | 2.928279616  |
| H  | 4.462390797  | -0.993664023 | 2.510139682  |
| H  | 3.907381771  | -1.272124241 | 0.838166174  |
| H  | 2.780453742  | -1.463850373 | 2.177493989  |
| C  | 1.301524129  | 3.792127687  | -2.267622373 |
| C  | 0.043303277  | 4.488799162  | -1.760494100 |
| C  | 1.086035911  | 2.298532940  | -2.065407351 |
| C  | -0.301901877 | 3.915614505  | -0.380790771 |
| H  | 2.177427227  | 4.124846379  | -1.699628244 |
| H  | 0.352790761  | 1.903453394  | -2.773269125 |
| H  | -0.783588636 | 4.271093325  | -2.441753555 |
| H  | -1.376132954 | 3.910629199  | -0.197014879 |
| H  | 0.161059728  | 5.574352994  | -1.717456550 |
| H  | 0.177542088  | 4.464509636  | 0.431772220  |
| H  | 1.983991606  | 1.682331272  | -2.127229757 |
| H  | 1.492822529  | 4.021243520  | -3.318947362 |
| C  | -1.085041351 | -2.298906496 | -2.065547775 |
| C  | -1.300854253 | -3.792526316 | -2.267282924 |
| C  | 0.302027952  | -3.915691168 | -0.379976995 |
| C  | -0.042892844 | -4.489244269 | -1.759574972 |
| H  | -0.351292052 | -1.904322919 | -2.773159032 |
| H  | -2.176966353 | -4.124843476 | -1.699373264 |
| H  | -0.177602682 | -4.464391655 | 0.432606250  |
| H  | 1.376220088  | -3.910647352 | -0.195968349 |
| H  | -0.160822372 | -5.574766440 | -1.716217143 |
| H  | 0.784227131  | -4.271883749 | -2.440671246 |
| H  | -1.491945715 | -4.021980539 | -3.318570111 |
| H  | -1.982767417 | -1.682443748 | -2.128044950 |

**Figure S3** Calculated (dashed lines) and experimental (solid line) absorption spectra of compound **4**. Experimental bands at 281 and 255 nm correspond to computed lines at 261, 251, 248 and 235 nm. Main contributions arise from transitions between HOMO-1, HOMO and LUMO, LUMO+1, depicted at Figure S4. The HOMO is localized on both the  $\pi$  orbitals of pyridyl moiety and the lone pair of P atom. HOMO-1 involves both the  $\pi$  orbitals of pyridyl moiety and the lone pair of N atom. LUMO and LUMO+1 are localised mainly on  $\pi^*$  orbitals of pyridyl moiety. Thus, the experimental bands should be assigned to transitions of mixed  $n-\pi^*$  and  $\pi-\pi^*$  character.

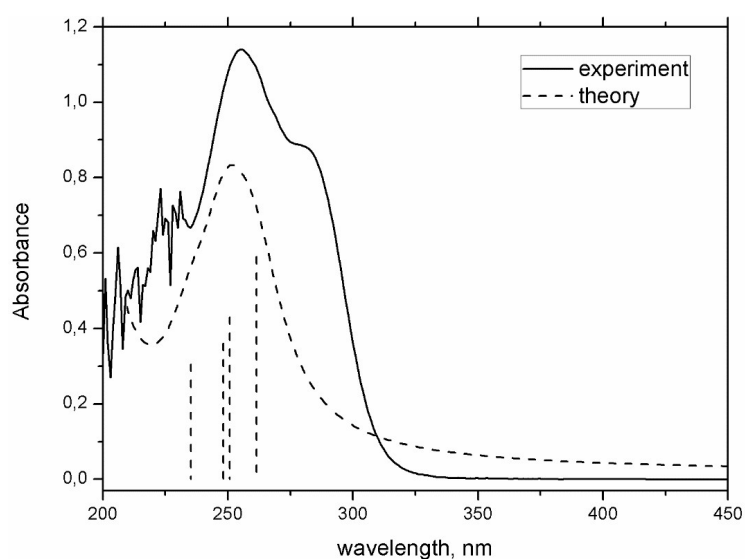

**Figure S4** Frontier orbitals of **4**.

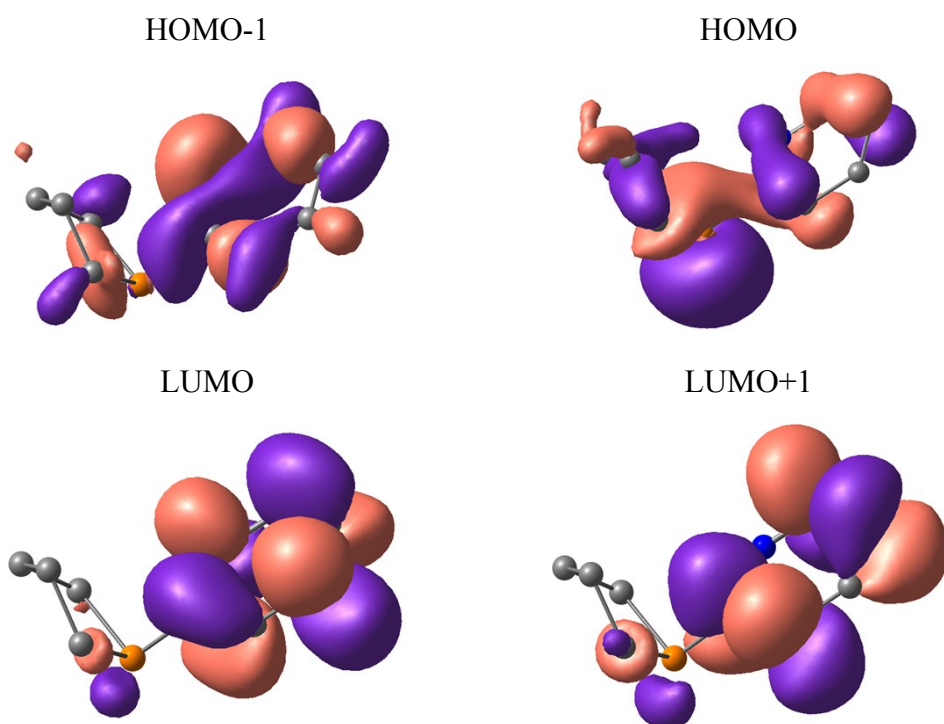

**Figure S5** Calculated absorption spectra of compounds **4** and **10-14**.

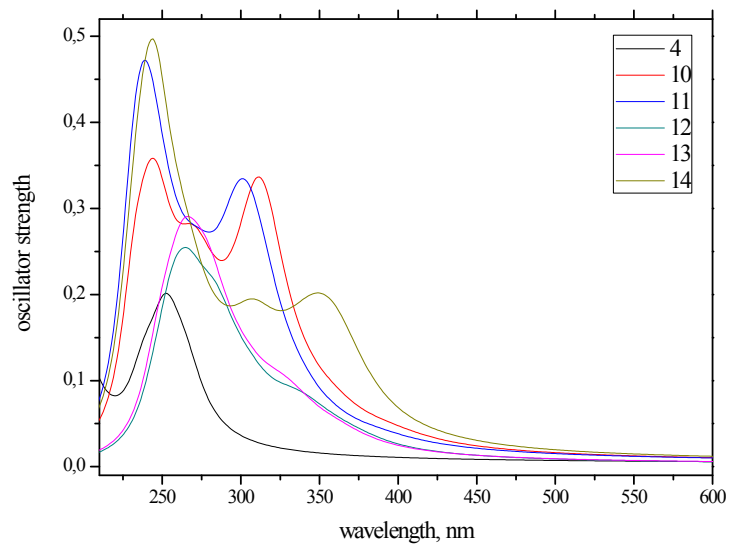

**Figure S6** Schematic representation of the molecular orbitals for the singlet ground state of **12**.

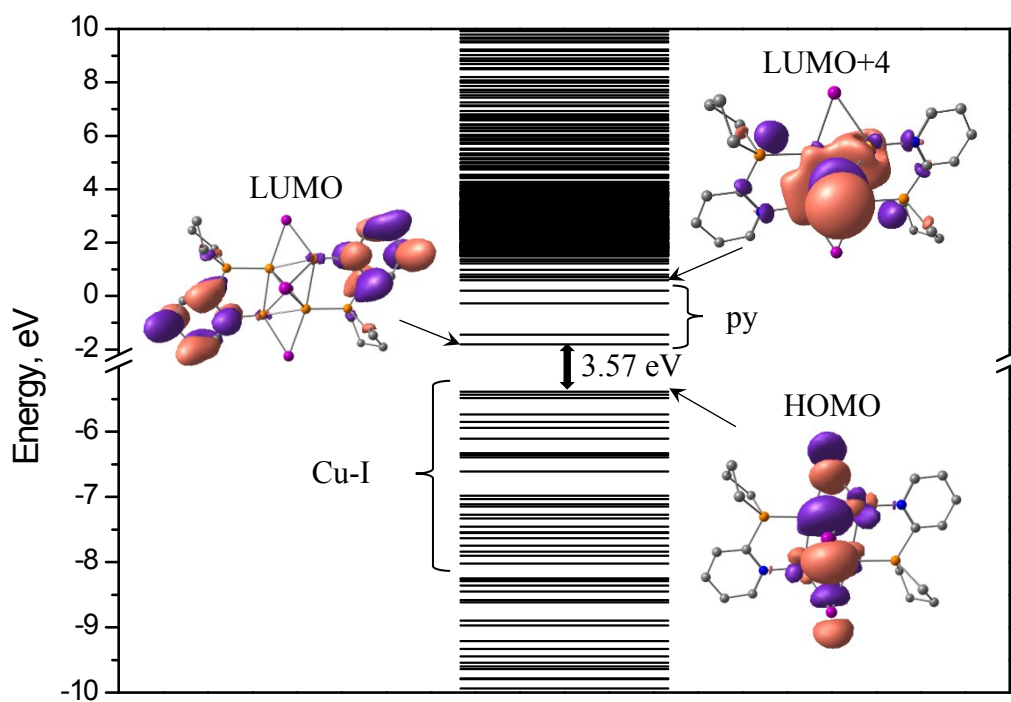

**Figure S7** ORTEP drawing of the molecular structure of complex **10\***. Hydrogen atoms are omitted for clarity.

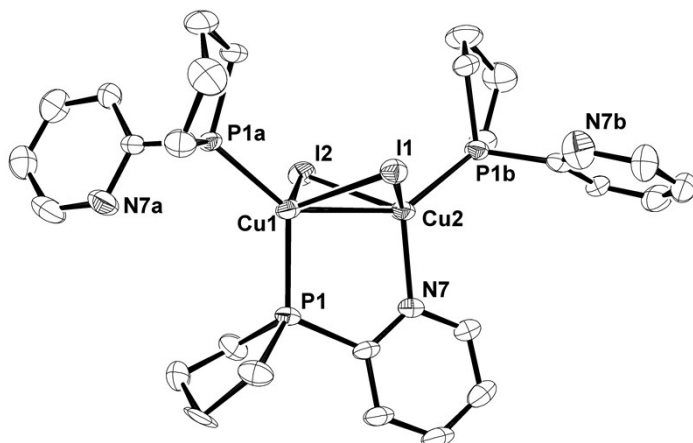

**Figure S8** ORTEP drawing of the molecular structure of complex **12\***. Hydrogen atoms are omitted for clarity.

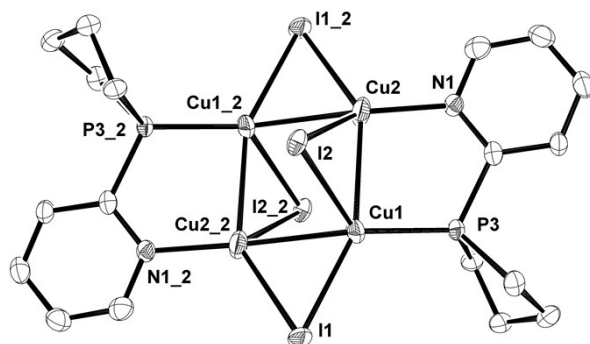

\*Pictures were generated with ORTEP3 for Windows<sup>1</sup>

[1] Sheldrick, G.M. A short history of SHELX SHELX (2008). Acta Cryst. A64, 112-122
